# Supplementary material
Source: PubMed Central journal article supplement (PMC2728994)
Supplement: 0904936106_0904936106SI.pdf [file 0904936106_0904936106SI.pdf]

# Supporting Information

Seidl et al. 10.1073/pnas.0904936106

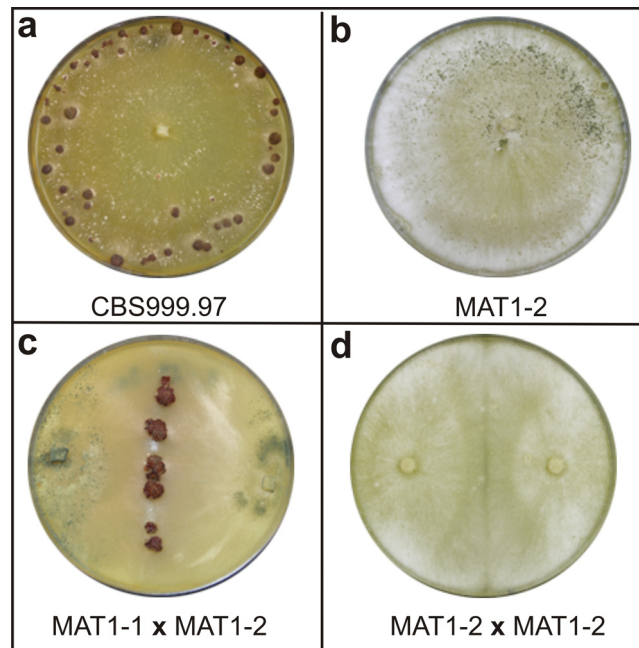

**Fig. S1.** Fruiting body formation in *H. jecorina*. (A) The wild-type isolate CBS999.97 forms stromata on the agar plate without the obvious presence of a mating partner. (B) Cultures from single ascospore isolates do not form stromata under the same conditions anymore (shown for *H. jecorina* MAT1-2). (C and D) Instead they form stromata at the interaction zones with strains of the opposite mating type (C), but not upon confrontation with a strain of the same mating type (D) (shown for *H. jecorina* MAT1-2).

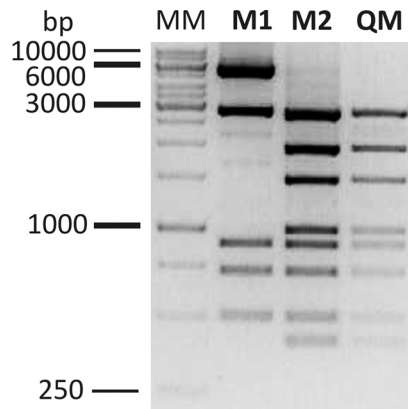

**Fig. S2.** Restriction fragment patterns of *H. jecorina* strains MAT1-1 and MAT1-2 and *T. reesei* QM6a. DNA fragment (3  $\mu$ g) of the *MAT*-locus, amplified with primers MATax2F and MATax2R (Table 1), was digested with *Pst*I. Restriction fragment patterns on a 0.8% agarose gel are shown. MM, molecular marker; M1, *H. jecorina* strain MAT1-1; M2, *H. jecorina* strain MAT1-2; QM, *T. reesei* strain QM6a. The size (bp) of the smallest, largest, and indicator bands of the molecular marker (GeneRuler 1-kb ladder; Fermentas) are given.

Table S1. Primers used in this study

| Primer                 | Sequence 5'-3'           |
|------------------------|--------------------------|
| MATax2F*               | CATCGAAGCATCTACCTACTTG   |
| MATax2R*               | CGAAGCGAAACACACGAC       |
| matA1-fw <sup>†</sup>  | TCCTCTCAATGCGTTCATGGC    |
| matA1-rv <sup>†</sup>  | AGAAGATCATTCTCTGTGTTGGGA |
| matA1-fwN <sup>†</sup> | TCCTGAAGTCCAACAGAAGAC    |
| matA1-rvN <sup>†</sup> | AGATAGATAGAAGGCTCCGTGA   |
| matA2-fw <sup>†‡</sup> | CTCGAGAGGGATATACACCAG    |
| matA2-rv <sup>†‡</sup> | CTTCCTACCGGATGCCAGA      |
| matA2-fwN <sup>†</sup> | ACTTAGGTCTGATGGCTATG     |
| matA2-rvN <sup>†</sup> | AAGAGATCATATAGGCGGCA     |
| matA3-fw <sup>†</sup>  | ATCTCCATGTCTTTATCCCGAAG  |
| matA3-rv <sup>†</sup>  | CTTGATGTCGGGATATTTCTCC   |
| matA3-fwN <sup>†</sup> | TCGCAACAGCTGGATCCTGTA    |
| matA3-rvN <sup>†</sup> | GTTCCGGCCTCCATTTCTGTG    |
| mat2fw <sup>§</sup>    | CAACACGTATGAAAGAGAGATG   |
| mat2rv <sup>§</sup>    | ATTGGAACGGATCACCTTCTTG   |

\*Amplification of mating type loci.

<sup>†</sup>RACE-PCR and RT-PCR.

<sup>‡</sup>Diagnostic PCR of *MAT1-1* loci.

<sup>§</sup>Diagnostic PCR of *MAT1-2* loci.
